# Supplementary material
Source: HighWire-hosted journal article supplement (https://qualitysafety.bmj.com/highwire/filestream/159108/field_highwire_adjunct_files/1/bmjqs-2020-011684supp002_data_supplement.pdf)
Supplement: bmjqs-2020-011684supp002_data_supplement.pdf [file bmjqs-2020-011684supp002_data_supplement.pdf]

**Effects of Night Surgery on Postoperative Mortality and Morbidity - A Multicentre Cohort Study**

## Supplemental Digital Content 2

STROBE Statement—Checklist of items that should be included in reports of cohort studies

|                          | Item No | Recommendation                                                                                                                                                                       | Page*                                                                    |
|--------------------------|---------|--------------------------------------------------------------------------------------------------------------------------------------------------------------------------------------|--------------------------------------------------------------------------|
| Title and abstract       | 1       | (a) Indicate the study’s design with a commonly used term in the title or the abstract                                                                                               | 1                                                                        |
|                          |         | (b) Provide in the abstract an informative and balanced summary of what was done and what was found                                                                                  | 2                                                                        |
| Introduction             |         |                                                                                                                                                                                      |                                                                          |
| Background/rationale     | 2       | Explain the scientific background and rationale for the investigation being reported                                                                                                 | 3                                                                        |
| Objectives               | 3       | State specific objectives, including any prespecified hypotheses                                                                                                                     | 3                                                                        |
| Methods                  |         |                                                                                                                                                                                      |                                                                          |
| Study design             | 4       | Present key elements of study design early in the paper                                                                                                                              | 4                                                                        |
| Setting                  | 5       | Describe the setting, locations, and relevant dates, including periods of recruitment, exposure, follow-up, and data collection                                                      | 4                                                                        |
| Participants             | 6       | (a) Give the eligibility criteria, and the sources and methods of selection of participants. Describe methods of follow-up                                                           | 4                                                                        |
|                          |         | (b) For matched studies, give matching criteria and number of exposed and unexposed                                                                                                  | 7<br>Supplemental Digital Content 1, section 6.1                         |
| Variables                | 7       | Clearly define all outcomes, exposures, predictors, potential confounders, and effect modifiers. Give diagnostic criteria, if applicable                                             | 4-7<br>Supplemental Digital Content 1, section 2-6, eTables 1, 2, 11, 16 |
| Data sources/measurement | 8*      | For each variable of interest, give sources of data and details of methods of assessment (measurement). Describe comparability of assessment methods if there is more than one group | 4<br>Suppelemtal Digital Content 1, section 1, 4                         |
| Bias                     | 9       | Describe any efforts to address potential sources of bias                                                                                                                            | 4-7;<br>Supplemental Digital Content 1, section 6                        |
| Study size               | 10      | Explain how the study size was arrived at                                                                                                                                            | 4, 8<br>Figure 1<br>Supplemental Digital Content 1, section 3            |
| Quantitative variables   | 11      | Explain how quantitative variables were handled in the analyses. If applicable, describe which groupings were chosen and why                                                         | 4-8<br>Supplemental Digital Content 1, section 2,                        |

|                     |     |                                                                                                                                                                                                              |                                                                  |
|---------------------|-----|--------------------------------------------------------------------------------------------------------------------------------------------------------------------------------------------------------------|------------------------------------------------------------------|
| Statistical methods | 12  | (a) Describe all statistical methods, including those used to control for confounding                                                                                                                        | 4-8<br>Supplemental Digital Content 1, section 2-7               |
|                     |     | (b) Describe any methods used to examine subgroups and interactions                                                                                                                                          | 4-6<br>Supplemental Digital Content 1, section 4-6, eTables 5-16 |
|                     |     | (c) Explain how missing data were addressed                                                                                                                                                                  | 4, 7<br>Supplemental Digital Content 1, section 3                |
|                     |     | (d) If applicable, explain how loss to follow-up was addressed                                                                                                                                               | n.a.                                                             |
|                     |     | (e) Describe any sensitivity analyses                                                                                                                                                                        | 6, 7<br>Supplemental Digital Content 1, section 4-8              |
| <b>Results</b>      |     |                                                                                                                                                                                                              |                                                                  |
| Participants        | 13* | (a) Report numbers of individuals at each stage of study—eg numbers potentially eligible, examined for eligibility, confirmed eligible, included in the study, completing follow-up, and analysed            | 8<br>Figure 1<br>Supplemental Digital Content 1, section 3       |
|                     |     | (b) Give reasons for non-participation at each stage                                                                                                                                                         | Figure 1                                                         |
|                     |     | (c) Consider use of a flow diagram                                                                                                                                                                           | Figure 1                                                         |
| Descriptive data    | 14* | (a) Give characteristics of study participants (eg demographic, clinical, social) and information on exposures and potential confounders                                                                     | 8, 9<br>Table 1<br>Table 2<br>eTables 3-5                        |
|                     |     | (b) Indicate number of participants with missing data for each variable of interest                                                                                                                          | Figure 1                                                         |
|                     |     | (c) Summarise follow-up time (eg, average and total amount)                                                                                                                                                  | n.a.                                                             |
| Outcome data        | 15* | Report numbers of outcome events or summary measures over time                                                                                                                                               | 7-9<br>Table 2                                                   |
| Main results        | 16  | (a) Give unadjusted estimates and, if applicable, confounder-adjusted estimates and their precision (eg, 95% confidence interval). Make clear which confounders were adjusted for and why they were included | 6-9<br>Tables 2-4<br>eTable 2                                    |
|                     |     | (b) Report category boundaries when continuous variables were categorized                                                                                                                                    | Supplemental Digital Content, section 2<br>eTable 2              |
|                     |     | (c) If relevant, consider translating estimates of relative risk into absolute risk for a meaningful time period                                                                                             | n.a.                                                             |
| Other analyses      | 17  | Report other analyses done—eg analyses of subgroups and interactions, and sensitivity analyses                                                                                                               | 9-11<br>Tables 3-4<br>eTables 5, 6, 7, 8, 9, 10, 12, 13, 14, 15  |

**Discussion**

|                          |    |                                                                                                                                                                            |       |
|--------------------------|----|----------------------------------------------------------------------------------------------------------------------------------------------------------------------------|-------|
| Key results              | 18 | Summarise key results with reference to study objectives                                                                                                                   | 12    |
| Limitations              | 19 | Discuss limitations of the study, taking into account sources of potential bias or imprecision. Discuss both direction and magnitude of any potential bias                 | 15-16 |
| Interpretation           | 20 | Give a cautious overall interpretation of results considering objectives, limitations, multiplicity of analyses, results from similar studies, and other relevant evidence | 12-14 |
| Generalisability         | 21 | Discuss the generalisability (external validity) of the study results                                                                                                      | 14-15 |
| <b>Other information</b> |    |                                                                                                                                                                            |       |
| Funding                  | 22 | Give the source of funding and the role of the funders for the present study and, if applicable, for the original study on which the present article is based              | 15    |

n.a. = not applicable

\* Pages according to page numbers in the manuscript.
